# Supplementary material
Source: MDPI journal article supplement (https://www.mdpi.com/2076-3417/14/9/3591)
Supplement: s1 [file s1]

# The Potential for Restoring the Activity of Oxidoreductases and Hydrolases in Soil Contaminated with Petroleum Products Using Perlite and Dolomite

Jadwiga Wyszowska \*, Agata Borowik, Magdalena Zaborowska and Jan Kucharski \*

**Table S1.** The level of significance (p-value) of the factors studied, determined by means of three-factor ANOVA (N=72).

| Variable | Factors                 |                           |             |          |          |          |          |
|----------|-------------------------|---------------------------|-------------|----------|----------|----------|----------|
|          | Kind of contaminant (A) | Dose of contamination (B) | Sorbent (C) | A×B      | A×C      | B×C      | A×B×C    |
| Ya       | <0.001 *                | <0.001 *                  | <0.001 *    | <0.001 * | <0.001 * | <0.001 * | <0.001 * |
| Yr       | <0.001 *                | <0.001 *                  | <0.001 *    | 0.131    | <0.001 * | 0.187    | <0.001 * |
| SPAD     | <0.001 *                | <0.001 *                  | <0.001 *    | <0.001 * | <0.001 * | <0.018 * | <0.045 * |
| Deh      | <0.001 *                | <0.001 *                  | <0.001 *    | <0.001 * | <0.001 * | <0.001 * | <0.001 * |
| Cat      | <0.001 *                | <0.001 *                  | <0.001 *    | <0.001 * | <0.001 * | <0.001 * | <0.001 * |
| Ure      | <0.001 *                | <0.001 *                  | <0.001 *    | <0.001 * | <0.001 * | <0.001 * | <0.001 * |
| AcP      | <0.001 *                | <0.001 *                  | <0.001 *    | <0.001 * | <0.001 * | 0.017    | <0.001 * |
| AlP      | <0.001 *                | <0.001 *                  | <0.001 *    | <0.001 * | <0.001 * | <0.001 * | <0.001 * |
| Aryl     | <0.001 *                | <0.001 *                  | <0.001 *    | <0.001 * | <0.001 * | <0.001 * | <0.001 * |
| Glu      | <0.001 *                | <0.001 *                  | <0.001 *    | <0.001 * | <0.001 * | 0.709    | <0.002 * |
| Corg     | <0.001 *                | <0.001 *                  | <0.001 *    | <0.001 * | <0.001 * | <0.001 * | <0.001 * |
| Ntotal   | <0.001 *                | <0.001 *                  | <0.001 *    | <0.001 * | <0.001 * | <0.001 * | <0.001 * |
| pH       | <0.001 *                | <0.001 *                  | <0.001 *    | <0.001 * | <0.001 * | <0.001 * | <0.001 * |
| HAC      | <0.001 *                | <0.001 *                  | <0.001 *    | <0.001 * | <0.001 * | <0.001 * | <0.001 * |
| EBC      | <0.001 *                | <0.001 *                  | <0.001 *    | <0.001 * | <0.001 * | <0.001 * | <0.001 * |
| CEC      | <0.001 *                | <0.006 *                  | <0.005 *    | <0.001 * | 0.057    | <0.001 * | <0.001 * |
| BS       | <0.001 *                | <0.001 *                  | <0.001 *    | <0.001 * | <0.001 * | <0.001 * | <0.001 * |
| BA1      | <0.001 *                | <0.001 *                  | <0.001 *    | <0.001 * | <0.001 * | <0.001 * | <0.001 * |
| BA2      | <0.001 *                | <0.001 *                  | <0.003 *    | <0.001 * | <0.001 * | <0.001 * | <0.001 * |

Explanations of abbreviations are provided in Figure 1 and Table 2 and 4.
